# Supplementary material for: Metabolic modeling of energy balances in Mycoplasma hyopneumoniae shows that pyruvate addition increases growth rate
Source: PubMed Central journal article supplement (PMC6084303; doi:10.1002/bit.26347), 2017-07-27
Supplement: BIT-114-2339-s006.pdf [file BIT-114-2339-s006.pdf]

Table S5: flux variability analysis at 99.99% of maximal initial growth rate

| Name                            | Basic solution | MIN        | MAX        | Allowed variation (%) | Variation >0.00001? | Significant | Direction | Reaction                                                                                  |
|---------------------------------|----------------|------------|------------|-----------------------|---------------------|-------------|-----------|-------------------------------------------------------------------------------------------|
| 'RXN1061'                       | 1.84E+001      | 1.84E+001  | 1.84E+001  | 0.000225743           | FALSE               | FALSE       | FALSE     | 'WATER_c + ATP_c <=> ADP_c + PROTON_c + PLI_c'                                            |
| 'A3_46_6_46_5_46_3RXN'          | 0.00E+000      | 0.00E+000  | 4.16E-005  | #DIV/0!               | FALSE               | FALSE       | FALSE     | 'WATER_c + GTP_c -> PROTON_c + PLI_c + GDP_c'                                             |
| 'RXN18KM'                       | 0.00E+000      | 0.00E+000  | 0.00E+000  | #DIV/0!               | FALSE               | FALSE       | FALSE     | 'WATER_c + PRPP_c -> ATP_c + NADINE_c -> ADP_c + PLI_c + PPI_c + NICOTINATE_NUCLEOTIDE_c' |
| 'URACILRIBOSYLTRANRXN'          | -1.48E-003     | -1.51E-003 | -1.48E-003 | -2.246884755          | FALSE               | FALSE       | FALSE     | 'UMP_c + PPI_c <=> PRPP_c + URACIL_c'                                                     |
| 'TRANSRXN168'                   | 0.00E+000      | 0.00E+000  | 0.00E+000  | #DIV/0!               | FALSE               | FALSE       | FALSE     | 'PHOSPHOENOLPYRUVATE_c + MANNOSE_6P_c -> MANNOSE6P_c + PYRUVATE_c'                        |
| 'DCTPPYRPHOSPHATASERXN'         | 0.00E+000      | 0.00E+000  | 2.08E-005  | #DIV/0!               | FALSE               | FALSE       | FALSE     | 'WATER_c + DCTP_c -> PROTON_c + DCMP_c + PPI_c'                                           |
| 'RXN2902'                       | 0.00E+000      | 0.00E+000  | 0.00E+000  | #DIV/0!               | FALSE               | FALSE       | FALSE     | 'COA_c + NAD_c + MALONATESALD_c -> ACETYLYCOA_c + NADH_c + CARBONDIOXIDE_c'               |
| 'DUTPPYRPHRXN'                  | 0.00E+000      | 0.00E+000  | 0.00E+000  | #DIV/0!               | FALSE               | FALSE       | FALSE     | 'WATER_c + DUTP_c -> PROTON_c + PPI_c + DUMP_c'                                           |
| 'A4_46_1_46_2_46_29RXN'         | 0.00E+000      | 0.00E+000  | 0.00E+000  | #DIV/0!               | FALSE               | FALSE       | FALSE     | 'CPD645_c -> DIHYDROXYACETONEPHOSPHATE_c + MALONATESALD_c'                                |
| 'RXN18KM8'                      | 4.03E-004      | 4.03E-004  | 4.24E-004  | 5.152018728           | FALSE               | FALSE       | FALSE     | 'DCDP_c + PHOSPHOENOLPYRUVATE_c -> PROTON_c -> DCTP_c + PYRUVATE_c'                       |
| 'MYOINOSITOL2DEHYDROGENASERXN'  | 0.00E+000      | 0.00E+000  | 0.00E+000  | #DIV/0!               | FALSE               | FALSE       | FALSE     | 'MYOINOSITOL_c + NAD_c -> PROTON_c + CPD365_c + NADH_c'                                   |
| 'RXN05292'                      | 0.00E+000      | 0.00E+000  | 4.16E-005  | #DIV/0!               | FALSE               | FALSE       | FALSE     | 'WATER_c + DCMP_c -> DEOXYCYTIDINE_c + PLI_c'                                             |
| 'A2_46_7_46_7_46_15RXN'         | 0.00E+000      | 0.00E+000  | 0.00E+000  | #DIV/0!               | FALSE               | FALSE       | FALSE     | 'CTP_c + PHOSPHORYLCHOLINE_c + PROTON_c -> CDPCOLINE_c + PPI_c'                           |
| 'CDPDI1637RXN'                  | 2.62E-003      | 2.62E-003  | 2.62E-003  | 0.005517349           | FALSE               | FALSE       | FALSE     | 'CTP_c + LPHOSPHATIDATE_c + PROTON_c -> CDPI1637_c + PPI_c'                               |
| 'RXN1391'                       | 2.77E-003      | 2.77E-003  | 2.77E-003  | 0.005517349           | FALSE               | FALSE       | FALSE     | 'GLYCEROL3P_c + LongChainAcCoAs_c -> ACYLSNGLYCEROL3P_c + COA_c'                          |
| 'RXN05375'                      | 0.00E+000      | 0.00E+000  | 0.00E+000  | #DIV/0!               | FALSE               | FALSE       | FALSE     | '2 PROTON_c + CPD01147_c + 2 NADH_c <=> ANTHRANILATE_c + CPD01148_c + 2 NAD_c'            |
| 'NACETYLDGLUCOSAMINEKINASERXN'  | 0.00E+000      | 0.00E+000  | 0.00E+000  | #DIV/0!               | FALSE               | FALSE       | FALSE     | 'ATP_c + NACETYLDGLUCOSAMINE_c -> ADP_c + PROTON_c + NACETYLDGLUCOSAMINE6P_c'             |
| 'GTPCYCLOHYDROIRXN'             | 0.00E+000      | 0.00E+000  | 0.00E+000  | #DIV/0!               | FALSE               | FALSE       | FALSE     | 'WATER_c + GTP_c <=> PROTON_c + DIHYDROEPTERINP3_c + FORMATE_c'                           |
| 'CHOLINEKINASERXN'              | 0.00E+000      | 0.00E+000  | 0.00E+000  | #DIV/0!               | FALSE               | FALSE       | FALSE     | 'ATP_c + CHOLINE_c -> ADP_c + PHOSPHORYLCHOLINE_c + PROTON_c'                             |
| 'ATPSYNRXN'                     | -1.11E-001     | -1.11E-001 | -1.11E-001 | -0.010821451          | FALSE               | FALSE       | FALSE     | 'WATER_c + 3 PROTON_c + ATP_c <=> 4 PROTON_c + ADP_c + PLI_c'                             |
| 'RXN12523'                      | 0.00E+000      | 0.00E+000  | 0.00E+000  | #DIV/0!               | FALSE               | FALSE       | FALSE     | '2 CPD318_c -> PROTON_c + ASCORBATE_c + LDEHYDROASCORBATE_c'                              |
| 'THYMIDYLATESPHOSPHATASERXN'    | 1.42E-001      | 1.42E-001  | 1.42E-001  | 0.0255163             | FALSE               | FALSE       | FALSE     | 'WATER_c + TMP_c -> THYMIDINE_c + PPI_c'                                                  |
| 'GAPXNPHOSPHNRXN'               | 1.08E+001      | 1.08E+001  | 1.08E+001  | 0.000191582           | FALSE               | FALSE       | FALSE     | 'PLI_c + GAP_c + NAD_c <=> DPG_c + PROTON_c + NADH_c'                                     |
| 'R503RXN'                       | 0.00E+000      | 0.00E+000  | 0.00E+000  | #DIV/0!               | FALSE               | FALSE       | FALSE     | 'WATER_c + CPD15167_c -> PROTON_c + CPD827_c'                                             |
| 'GMKALTRXN'                     | 4.03E-004      | 0.00E+000  | 4.03E-004  | 100                   | TRUE                | FALSE       | FALSE     | 'ATP_c + DGMP_c -> ADP_c + DGDP_c'                                                        |
| 'RXN05305'                      | 0.00E+000      | 0.00E+000  | 0.00E+000  | #DIV/0!               | FALSE               | FALSE       | FALSE     | 'CPD01108_c <=> RIBOSE_c'                                                                 |
| 'LACTOSE6PHOSPHATEISOMERASERXN' | 0.00E+000      | 0.00E+000  | 0.00E+000  | #DIV/0!               | FALSE               | FALSE       | FALSE     | 'CPD1241_c <=> TAGT0SE6PHOSPHATE_c'                                                       |
| 'RXN18KM6'                      | 1.42E-001      | 1.42E-001  | 1.42E-001  | 0.0255163             | FALSE               | FALSE       | FALSE     | 'Acceptor_c + 2 PROTON_c + ASCORBATE_c -> CPD318_c + DonorH2_c'                           |
| 'GLUCOSAMINE6PDEAMINRXN'        | 0.00E+000      | 0.00E+000  | 0.00E+000  | #DIV/0!               | FALSE               | FALSE       | FALSE     | 'WATER_c + DGLUCOSAMINE6P_c -> AMMONIA_c + PROTON_c + FRUCTOSE6P_c'                       |
| 'RIBULO3PIMRXN'                 | -2.90E-003     | -2.91E-003 | -2.90E-003 | -0.17848297           | FALSE               | FALSE       | FALSE     | 'RIBULOSE5P_c <=> XYLULOSE5PHOSPHATE_c'                                                   |
| 'DEOXYADENYLATEKINASERXN'       | 8.04E-005      | 3.88E-005  | 5.17E-004  | 594.2523832           | TRUE                | FALSE       | FALSE     | 'ATP_c + DAMP_c -> ADP_c + DADD_c'                                                        |
| 'RXN11811'                      | 0.00E+000      | 0.00E+000  | 0.00E+000  | #DIV/0!               | FALSE               | FALSE       | FALSE     | 'AMMONIA_c + PROTON_c <=> AMMONIUM_c'                                                     |
| 'RXN05199'                      | 0.00E+000      | 0.00E+000  | 2.08E-005  | #DIV/0!               | FALSE               | FALSE       | FALSE     | 'PLI_c + GUANOSINE_c <=> RIBOSE1P_c + GUANINE_c'                                          |
| 'RXN10381'                      | 0.00E+000      | 0.00E+000  | 0.00E+000  | #DIV/0!               | FALSE               | FALSE       | FALSE     | 'Xylose_c + 2 PROTON_c + ASCORBATE_c -> CPD318_c + DonorH2_c'                             |
| 'RXN12149'                      | 0.00E+000      | 0.00E+000  | 0.00E+000  | #DIV/0!               | FALSE               | FALSE       | FALSE     | 'Lrhannose_c <=> LRHAMNOLURANOSE_c'                                                       |
| 'A1TRANSEKTORXN'                | 1.45E-003      | 1.45E-003  | 1.45E-003  | 0.178842966           | FALSE               | FALSE       | FALSE     | 'GAP_c + DSEDOHEPTULOSE7P_c <=> XYLULOSE5PHOSPHATE_c + RIBOSE5P_c'                        |
| 'PGPPHOSPHARXN'                 | 1.31E-003      | 1.31E-003  | 1.31E-003  | 0.005517349           | FALSE               | FALSE       | FALSE     | 'WATER_c + L1PHOSPHATIDYLGLYCEROL_c -> L1PHOSPHATIDYLGLYCEROL_c + PLI_c'                  |
| 'A2TRANSEKTORXN'                | -1.45E-003     | -1.45E-003 | -1.45E-003 | -0.178842966          | FALSE               | FALSE       | FALSE     | 'XYLULOSE5PHOSPHATE_c + ERYTHROSE4P_c <=> GAP_c + FRUCTOSE6P_c'                           |
| 'RXN12440'                      | 0.00E+000      | 0.00E+000  | 0.00E+000  | #DIV/0!               | FALSE               | FALSE       | FALSE     | 'HYDROGENPEROXIDE_c + PROTON_c -> 2 WATER_c + ASCORBATE_c + LDEHYDROASCORBATE_c'          |
| 'RXN1623'                       | 2.77E-003      | 2.77E-003  | 2.77E-003  | 0.005517349           | FALSE               | FALSE       | FALSE     | 'ACYLSNGLYCEROL3P_c + LongChainAcCoAs_c -> LPHOSPHATIDATE_c + COA_c'                      |
| 'RXN17254'                      | 0.00E+000      | 0.00E+000  | 0.00E+000  | #DIV/0!               | FALSE               | FALSE       | FALSE     | 'WATER_c + NADH_c -> CPD02472_c'                                                          |
| 'DEOXYGUANPHOSPHORXN'           | -4.03E-004     | -4.03E-004 | 0.00E+000  | -100                  | TRUE                | FALSE       | FALSE     | 'PLI_c + DEOXYGUANOSINE_c <=> DEOXYRIBOSE1PHOSPHATE_c + GUANINE_c'                        |
| 'DEOXYCYTIDINEKINASERXN'        | 4.03E-004      | 3.70E-004  | 4.45E-004  | 18.56238747           | FALSE               | FALSE       | FALSE     | 'DEOXYCYTIDINE_c + ATP_c -> ADP_c + PROTON_c + DCMP_c'                                    |
| 'RXN12753'                      | 0.00E+000      | 0.00E+000  | 0.00E+000  | #DIV/0!               | FALSE               | FALSE       | FALSE     | 'WATER_c + NADH_c -> CPD653_c'                                                            |
| 'ADENPHOSPHORXN'                | 0.00E+000      | 0.00E+000  | 2.08E-005  | #DIV/0!               | FALSE               | FALSE       | FALSE     | 'ADENOSINE_c + PLI_c <=> RIBOSE1P_c + ADENINE_c'                                          |
| 'RXN12862'                      | 0.00E+000      | 0.00E+000  | 0.00E+000  | #DIV/0!               | FALSE               | FALSE       | FALSE     | 'WATER_c + LDEHYDROASCORBATE_c -> CPD13907_c'                                             |
| 'RXN8141'                       | 1.31E-003      | 1.31E-003  | 1.31E-003  | 0.005517349           | FALSE               | FALSE       | FALSE     | 'L1PHOSPHATIDYLGLYCEROL_c + CDPI1637_c <=> CMP_c + CARDIOLIPIN_c + PROTON_c'              |
| 'PANTEPADENYLTRANRXN'           | 0.00E+000      | 0.00E+000  | 0.00E+000  | #DIV/0!               | FALSE               | FALSE       | FALSE     | 'PROTON_c + ATP_c + PANTETHEINP_c -> DEPHOSPHOCCA_c + PPI_c'                              |
| 'TRANRXN104'                    | 0.00E+000      | -4.16E-005 | 0.00E+000  | #DIV/0!               | FALSE               | FALSE       | FALSE     | 'PROTON_c + LLACTATE_c -> PROTON_c + LLACTATE_c'                                          |
| 'RXN18KM2'                      | 0.00E+000      | 0.00E+000  | 0.00E+000  | #DIV/0!               | FALSE               | FALSE       | FALSE     | 'FRU_6P_c + PHOSPHOENOLPYRUVATE_c -> FRU1P_c + PYRUVATE_c'                                |
| 'RXN0705'                       | 0.00E+000      | 0.00E+000  | 0.00E+000  | #DIV/0!               | FALSE               | FALSE       | FALSE     | 'PROTON_c + CPD2343_c -> CARBONDIOXIDE_c + LXYLULOSE5P_c'                                 |
| 'NADHDEHYDROGENASERXN'          | 1.08E+001      | 1.08E+001  | 1.08E+001  | 0.00033818            | FALSE               | FALSE       | FALSE     | '2 PROTON_c -> 2 NAD_c + PROTON_c -> 2 WATER_c + 2 NAD_c'                                 |
| 'RIBULOPEMIRXN'                 | 0.00E+000      | 0.00E+000  | 0.00E+000  | #DIV/0!               | FALSE               | FALSE       | FALSE     | 'RIBULOSE5P_c <=> XYLULOSE5PHOSPHATE_c'                                                   |
| 'A1_46_2_46_1_46_27RXN'         | 0.00E+000      | 0.00E+000  | 0.00E+000  | #DIV/0!               | FALSE               | FALSE       | FALSE     | 'WATER_c + COA_c + CPD12179_c + NAD_c <=> PROTON_c + PROPIONYLCOA_c + NADH_c + HCO3_c'    |
| 'PHOSPHOGLYCERATEKINASEGTPRXN'  | -2.18E-001     | -2.18E-001 | 5.18E+000  | -2479.448377          | TRUE                | FALSE       | FALSE     | 'GTP_c + G3P_c <=> DPG_c + GDP_c'                                                         |
| 'RXN12863'                      | 0.00E+000      | 0.00E+000  | 0.00E+000  | #DIV/0!               | FALSE               | FALSE       | FALSE     | 'HYDROGENPEROXIDE_c + CPD13907_c -> 3 PROTON_c + OXALATE_c + LTHREONATE_c'                |
| 'RXN12869'                      | 0.00E+000      | 0.00E+000  | 0.00E+000  | #DIV/0!               | FALSE               | FALSE       | FALSE     | 'CPD13907_c -> CPD13914_c'                                                                |
| 'RXN18KM13'                     | -9.96E-004     | -9.96E-004 | 5.40E+000  | -541.798.2693         | TRUE                | FALSE       | FALSE     | 'DAP_c + G3P_c <=> DPG_c + DADP_c'                                                        |
| 'RXN12861'                      | 0.00E+000      | 0.00E+000  | 0.00E+000  | #DIV/0!               | FALSE               | FALSE       | FALSE     | 'CPD13907_c -> CPD334_c + PROTON_c'                                                       |
| 'RXN14143'                      | 0.00E+000      | 0.00E+000  | 4.16E-005  | #DIV/0!               | FALSE               | FALSE       | FALSE     | 'WATER_c + DUMP_c -> PLI_c + DEOXYURIDINE_c'                                              |
| 'A5_46_3_46_1_46_17RXN'         | 0.00E+000      | 0.00E+000  | 0.00E+000  | #DIV/0!               | FALSE               | FALSE       | FALSE     | 'CPD37_c <=> CPD343_c'                                                                    |
| 'RXN08654'                      | 0.00E+000      | 0.00E+000  | 0.00E+000  | #DIV/0!               | FALSE               | FALSE       | FALSE     | 'PROTON_c + ATP_c + PLI_c + LIPOICACID_c -> LIPOYLAMP_c + PPI_c'                          |
| 'RXN02461'                      | 0.00E+000      | 0.00E+000  | 0.00E+000  | #DIV/0!               | FALSE               | FALSE       | FALSE     | 'L1PHOSPHATIDYLGLYCEROL_c + ASCORBATE_c -> L1ASCORBATE6PHOSPHATE_c + PYRUVATE_c'          |
| 'RIBOFLAVINKINRXN'              | 0.00E+000      | 0.00E+000  | 0.00E+000  | #DIV/0!               | FALSE               | FALSE       | FALSE     | 'RIBOFLAVIN_c + ATP_c -> FMN_c + ADP_c + PROTON_c'                                        |
| 'ETHANOLAMINEKINASERXN'         | 0.00E+000      | 0.00E+000  | 0.00E+000  | #DIV/0!               | FALSE               | FALSE       | FALSE     | 'ATP_c + ETHANOLAMINE_c <=> PHOSPHORYLETANOLAMINE_c + ADP_c + PROTON_c'                   |
| 'AMPDEPHOSPHORYLATIONRXN'       | 0.00E+000      | 0.00E+000  | 2.08E-005  | #DIV/0!               | FALSE               | FALSE       | FALSE     | 'WATER_c + AMP_c -> ADENOSINE_c + PLI_c'                                                  |
| 'RXN14142'                      | 0.00E+000      | 0.00E+000  | 4.16E-005  | #DIV/0!               | FALSE               | FALSE       | FALSE     | 'WATER_c + DGMP_c -> PLI_c + DEOXYGUANOSINE_c'                                            |
| 'RXN7609'                       | 0.00E+000      | 0.00E+000  | 2.08E-005  | #DIV/0!               | FALSE               | FALSE       | FALSE     | 'WATER_c + GMP_c -> PLI_c + GUANOSINE_c'                                                  |
| 'RXN12872'                      | 0.00E+000      | 0.00E+000  | 0.00E+000  | #DIV/0!               | FALSE               | FALSE       | FALSE     | 'CPD13911_c -> CPD13912_c'                                                                |
| 'RXN14025'                      | 0.00E+000      | 0.00E+000  | 2.08E-005  | #DIV/0!               | FALSE               | FALSE       | FALSE     | 'WATER_c + UMP_c -> URIDINE_c + PLI_c'                                                    |
| 'RXN14026'                      | 0.00E+000      | 0.00E+000  | 1.28E-005  | #DIV/0!               | FALSE               | FALSE       | FALSE     | 'WATER_c + CMP_c -> PLI_c + CYTIDINE_c'                                                   |
| 'RXN05214'                      | 0.00E+000      | 0.00E+000  | 0.00E+000  | #DIV/0!               | FALSE               | FALSE       | FALSE     | 'WATER_c + LASCORBATE6PHOSPHATE_c <=> CPD2343_c'                                          |
| 'RXN12870'                      | 0.00E+000      | 0.00E+000  | 0.00E+000  | #DIV/0!               | FALSE               | FALSE       | FALSE     | 'CPD334_c -> CPD13913_c'                                                                  |
| 'RXN14150'                      | 0.00E+000      | 0.00E+000  | 0.00E+000  | #DIV/0!               | FALSE               | FALSE       | FALSE     | 'CPD827_c <=> CPD15127_c'                                                                 |
| 'GUANRIBOSYLTRANRXN'            | -9.64E-004     | -1.39E-003 | 9.63E-004  | -43.7988147           | TRUE                | FALSE       | FALSE     | 'PPI_c + GMP_c <=> PRPP_c + GUANINE_c'                                                    |
| 'RXN18KM10'                     | 9.96E-004      | 9.96E-004  | 9.96E-004  | 0.005517349           | FALSE               | FALSE       | FALSE     | 'PHOSPHOENOLPYRUVATE_c + PROTON_c + TDP_c -> TTP_c + PYRUVATE_c'                          |
| 'RXN12871'                      | 0.00E+000      | 0.00E+000  | 0.00E+000  | #DIV/0!               | FALSE               | FALSE       | FALSE     | 'WATER_c + CPD13913_c -> PROTON_c + CPD13912_c'                                           |
| 'RXN18KM15'                     | 5.40E+000      | -4.03E-004 | 5.40E+000  | 100.007484            | TRUE                | FALSE       | FALSE     | 'DGTP_c + G3P_c <=> DPG_c + DGDP_c'                                                       |
| 'TRANSDOLDRXN'                  | -1.45E-003     | -1.45E-003 | -1.45E-003 | -0.178842966          | FALSE               | FALSE       | FALSE     | 'GAP_c + DSEDOHEPTULOSE7P_c <=> ERYTHROSE4P_c + FRUCTOSE6P_c'                             |
| 'A3_46_1_46_4_46_2RXN'          | 0.00E+000      | 0.00E+000  | 0.00E+000  | #DIV/0!               | FALSE               | FALSE       | FALSE     | 'WATER_c + L1GLYCEROPHOSPHORYLCHOLINE_c -> GLYCEROL3P_c + PROTON_c + CHOLINE_c'           |
| 'RIBOSOMRXN'                    | -2.90E-003     | -2.91E-003 | -2.90E-003 | -0.17848297           | FALSE               | FALSE       | FALSE     | 'RIBOSE5P_c <=> XYLULOSE5P_c'                                                             |
| 'RXN18KM7'                      | 1.95E-001      | 1.95E-001  | 1.95E-001  | 0.017049589           | FALSE               | FALSE       | FALSE     | 'UDP_c + PHOSPHOENOLPYRUVATE_c + PROTON_c -> PYRUVATE_c + UTP_c'                          |
| 'A3_46_6_46_3_46_20RXN'         | 1.28E-001      | 1.28E-001  | 1.28E-001  | 0.01627227            | FALSE               | FALSE       | FALSE     | 'WATER_c + ATP_c + GLYCEROL3P_c <=> GLYCEROL3P_c + ADP_c + PROTON_c + PLI_c'              |
| 'DEOXYADENYLPHOSPHORXN'         | -8.04E-005     | -5.17E-004 | -3.88E-005 | -594.2523829          | TRUE                | FALSE       | FALSE     | 'PLI_c + DEOXYADENOSINE_c <=> DEOXYRIBOSE1PHOSPHATE_c + ADENINE_c'                        |
| 'MANNPDEHYDROGRXN'              | 0.00E+000      | 0.00E+000  | 0.00E+000  | #DIV/0!               | FALSE               | FALSE       | FALSE     | 'MANNITOL1P_c + NAD_c <=> PROTON_c + NADH_c + FRUCTOSE6P_c'                               |
| 'TRANRXN156'                    | 0.00E+000      | 0.00E+000  | 0.00E+000  | #DIV/0!               | FALSE               | FALSE       | FALSE     | 'PHOSPHOENOLPYRUVATE_c + MANNITOL_6P_c -> MANNITOL1P_c + PYRUVATE_c'                      |
| 'PHOSACETYLTRANRXN'             | 1.08E+001      | 1.08E+001  | 1.08E+001  | 0.000383164           | FALSE               | FALSE       | FALSE     | 'ACETYLYCOA_c + PLI_c <=> COA_c + ACETYLYP_c'                                             |
| 'ACETATEKINRXN'                 | -1.08E+001     | -1.08E+001 | -1.08E+001 | -0.000383164          | FALSE               | FALSE       | FALSE     | 'ADP_c + ATP_c <=> ADP_c + AMP_c'                                                         |
| 'A3_46_6_46_3_46_17RXN'         | 0.00E+000      | 0.00E+000  | 0.00E+000  | #DIV/0!               | FALSE               | FALSE       | FALSE     | 'WATER_c + RIBOSE_6P_c + ATP_c -> ADP_c + RIBOSE_c + ADP_c + PROTON_c + PLI_c'            |
| 'NICONUCADENYLTRANRXN'          | 0.00E+000      | 0.00E+000  | 0.00E+000  | #DIV/0!               | FALSE               | FALSE       | FALSE     | 'PROTON_c + ATP_c + NICOTINATE_NUCLEOTIDE_c <=> PPI_c + DEAMIDONAD_c'                     |
| 'TRANRXN131'                    | 5.10E-001      | 5.10E-001  | 5.10E-001  | 0.004074449           | FALSE               | FALSE       | FALSE     | 'GLYCEROL_6P_c -> GLYCEROL_c'                                                             |
| 'LXYLU5P6RXN'                   | 0.             |            |            |                       |                     |             |           |                                                                                           |

|                                  |            |            |            |              |       |       |       |                                                                                                                    |
|----------------------------------|------------|------------|------------|--------------|-------|-------|-------|--------------------------------------------------------------------------------------------------------------------|
| 'CTPSYNRXN'                      | 6.19E-004  | 6.19E-004  | 6.53E-004  | 5.367558022  | FALSE | FALSE | FALSE | 'WATER_c + GLN_c + ATP_c + UTP_c <=> CTP_c + GLT_c + ADP_c + 2 PROTON_c + Pi_c'                                    |
| 'PHOSPHALGYPYNRXN'               | 1.31E-003  | 1.31E-003  | 1.31E-003  | 0.005517349  | FALSE | FALSE | FALSE | 'GLYCEROL3P_c + CDPDIACYLGLYCEROL_c -> CMP_c + L1PHOSPHATIDYLGLYCEROLP_c + PROTON_c'                               |
| 'DIHYDROLIPNRXN'                 | 0.00E+000  | 0.00E+000  | 0.00E+000  | #DIV/0!      | FALSE | FALSE | FALSE | 'DIHYDROLIPOAMIDE_c + NAD_c <=> LIPOAMIDE_c + PROTON_c + NADH_c'                                                   |
| 'MANNPISMRXN'                    | 0.00E+000  | 0.00E+000  | 0.00E+000  | #DIV/0!      | FALSE | FALSE | FALSE | 'MANNOSE6P_c <=> FRUCTOSE6P_c'                                                                                     |
| 'PHOSGLYPHOSRXN'                 | -1.60E+001 | -1.60E+001 | -1.06E+001 | -33.88460052 | TRUE  | FALSE | FALSE | 'ATP_c + GLN_c + ADP_c + 2 PROTON_c + Pi_c <=> AMP_c + NADH_c + AMP_c'                                             |
| 'NADSYNTHNRXN'                   | 0.00E+000  | 0.00E+000  | 0.00E+000  | #DIV/0!      | FALSE | FALSE | FALSE | 'WATER_c + ATP_c + MET_c -> Pi_c + PPI_c + SADENOSYL METHIONINE_c'                                                 |
| 'SADENMETSYNRXN'                 | 0.00E+000  | 0.00E+000  | 0.00E+000  | #DIV/0!      | FALSE | FALSE | FALSE | 'OROTIDINESPHOSPHATE_c + PROTON_c -> UMP_c + CARBONDIOXIDE_c'                                                      |
| 'OROTDECARBRXN'                  | 0.00E+000  | 0.00E+000  | 0.00E+000  | #DIV/0!      | FALSE | FALSE | FALSE | 'ATP_c + GLYCEROL_c -> GLYCEROL3P_c + ADP_c + PROTON_c'                                                            |
| 'GLYCEROLKINRXN'                 | 5.10E-001  | 5.10E-001  | 5.10E-001  | 0.004074449  | FALSE | FALSE | FALSE | 'WATER_c + GLN_c + LglutamyltRNAGln_c + ATP_c -> GLT_c + ADP_c + PROTON_c + ChargedGLNtRNAs_c + Pi_c'              |
| 'A6_46_3_46_5_46_7RXN'           | 0.00E+000  | 0.00E+000  | 4.16E-005  | #DIV/0!      | FALSE | FALSE | FALSE | 'WATER_c + ChargedASNtRNAs_c <=> 2 PROTON_c + ASNtRNAs_c + ASN_c'                                                  |
| 'RXN02403'                       | -1.27E-002 | -1.27E-002 | -1.27E-002 | -0.166553563 | FALSE | FALSE | FALSE | 'GLNtRNAs_c + GLT_c + PROTON_c + ATP_c -> LglutamyltRNAGln_c + PPI_c + AMP_c'                                      |
| 'RXN0398'                        | 0.00E+000  | 0.00E+000  | 0.00E+000  | #DIV/0!      | FALSE | FALSE | FALSE | 'PROTON_c + ATP_c + LAsPARTATE_c + ASPtRNAs_c -> PPI_c + AMP_c + ChargedASPtRNAs_c'                                |
| 'ASPARTATETRNALGASERXN'          | 1.15E-002  | 1.15E-002  | 1.15E-002  | 0.004673543  | FALSE | FALSE | FALSE | 'GLN_c + GLNtRNAs_c + PROTON_c + ATP_c -> ChargedGLNtRNAs_c + PPI_c + AMP_c'                                       |
| 'GLUTAMINETRNALGASERXN'          | 1.08E-002  | 1.08E-002  | 1.08E-002  | 0.386915571  | FALSE | FALSE | FALSE | 'TYR_c + PROTON_c + ATP_c + TYRtRNAs_c -> ChargedTYRtRNAs_c + PPI_c + AMP_c'                                       |
| 'TYROSINETRNALGASERXN'           | 6.37E-003  | 6.37E-003  | 6.37E-003  | 0.003279398  | FALSE | FALSE | FALSE | 'GLY_c + GLYtRNAs_c + PROTON_c + ATP_c -> ChargedGLYtRNAs_c + PPI_c + AMP_c'                                       |
| 'GLYCINETRNALGASERXN'            | 1.34E-002  | 1.34E-002  | 1.34E-002  | 0.003278922  | FALSE | FALSE | FALSE | 'ILEtRNAs_c + PROTON_c + ATP_c + ILE_c -> ChargedILEtRNAs_c + PPI_c + AMP_c'                                       |
| 'ISOLEUCINETRNALGASERXN'         | 1.40E-002  | 1.40E-002  | 1.40E-002  | 0.005097958  | FALSE | FALSE | FALSE | 'ARGtRNAs_c + PROTON_c + ATP_c + ARG_c -> ChargedARGtRNAs_c + PPI_c + AMP_c'                                       |
| 'ARGININETRNALGASERXN'           | 0.00E+000  | 0.00E+000  | 0.00E+000  | #DIV/0!      | FALSE | FALSE | FALSE | 'VAL_c + VALtRNAs_c + PROTON_c + ATP_c -> ChargedVALtRNAs_c + PPI_c + AMP_c'                                       |
| 'VALINETRNALGASERXN'             | 1.59E-002  | 1.59E-002  | 1.59E-002  | 0.003277458  | FALSE | FALSE | FALSE | 'LEUcRNAs_c + PROTON_c + ATP_c + LEU_c -> ChargedLEUcRNAs_c + PPI_c + AMP_c'                                       |
| 'LEUCINETRNALGASERXN'            | 1.85E-002  | 1.85E-002  | 1.85E-002  | 0.005800272  | FALSE | FALSE | FALSE | 'PROTON_c + ATP_c + CYS_c + CYStRNAs_c -> PPI_c + AMP_c + ChargedCYStRNAs_c'                                       |
| 'CYSTEINETRNALGASERXN'           | 1.91E-003  | 1.91E-003  | 1.91E-003  | 0.003279398  | FALSE | FALSE | FALSE | 'PROTON_c + ATP_c + TRPcRNAs_c + TRP_c -> ChargedTRPcRNAs_c + PPI_c + AMP_c'                                       |
| 'TRYPTOPHANTRNALGASERXN'         | 1.91E-003  | 1.91E-003  | 1.91E-003  | 0.003279398  | FALSE | FALSE | FALSE | 'THRtRNAs_c + PROTON_c + ATP_c + THR_c -> ChargedTHRtRNAs_c + PPI_c + AMP_c'                                       |
| 'THREONINETRNALGASERXN'          | 1.34E-002  | 1.34E-002  | 1.34E-002  | 0.003278922  | FALSE | FALSE | FALSE | 'PROTON_c + ATP_c + LALPHAALANINE_c + ALAaRNAs_c -> ChargedALAaRNAs_c + PPI_c + AMP_c'                             |
| 'GLYSRXN'                        | 1.40E-002  | 1.40E-002  | 1.40E-002  | 0.007006892  | FALSE | FALSE | FALSE | 'PROTON_c + ATP_c + LYSrRNAs_c + LYS_c -> ChargedLYSrRNAs_c + PPI_c + AMP_c'                                       |
| 'ALANINETRNALGASERXN'            | 1.72E-002  | 1.72E-002  | 1.72E-002  | 0.003277956  | FALSE | FALSE | FALSE | 'HIS_c + PROTON_c + ATP_c + HISrRNAs_c -> ChargedHISrRNAs_c + PPI_c + AMP_c'                                       |
| 'LYSINETRNALGASERXN'             | 2.04E-002  | 2.04E-002  | 2.04E-002  | 0.004819444  | FALSE | FALSE | FALSE | 'PROTON_c + ATP_c + SERcRNAs_c + SER_c -> ChargedSERcRNAs_c + PPI_c + AMP_c'                                       |
| 'HISTIDINETRNALGASERXN'          | 3.82E-003  | 3.82E-003  | 3.82E-003  | 0.003277778  | FALSE | FALSE | FALSE | 'PROTON_c + ATP_c + PHE_c + PHErRNAs_c -> ChargedPHErRNAs_c + PPI_c + AMP_c'                                       |
| 'SERINETRNALGASERXN'             | 1.34E-002  | 1.34E-002  | 1.34E-002  | 0.003399177  | FALSE | FALSE | FALSE | 'PROTON_c + ATP_c + MET_c + METrRNAs_c -> PPI_c + AMP_c + ChargedMETrRNAs_c'                                       |
| 'PHENYLALANINETRNALGASERXN'      | 9.56E-003  | 9.56E-003  | 9.56E-003  | 0.004673543  | FALSE | FALSE | FALSE | 'PRO_c + PROTON_c + ATP_c + PROrRNAs_c -> ChargedPROrRNAs_c + PPI_c + AMP_c'                                       |
| 'ASPARAGINETRNALGASERXN'         | 0.00E+000  | 0.00E+000  | 2.98E-005  | #DIV/0!      | FALSE | FALSE | FALSE | 'RedThioredoxin_c + NADP_c <=> PROTON_c + NADPH_c + OxThioredoxin_c'                                               |
| 'METHIONINETRNALGASERXN'         | 3.19E-003  | 3.19E-003  | 3.19E-003  | 0.011201185  | FALSE | FALSE | FALSE | 'WATER_c + ADP_c -> apoADP_c + PANTHEINEINP_c'                                                                     |
| 'PROLINETRNALGASERXN'            | 8.92E-003  | 8.92E-003  | 8.92E-003  | 0.003278694  | FALSE | FALSE | FALSE | 'Pyruvatedehydrogenaseiploate_c + PROTON_c + PYRUVATE_c -> PyruvatedehydrogenaseactyDHPilopyl_c + CARBONDIOXIDE_c' |
| 'THIOREDOXINREDUCTNADPHRXN'      | -9.16E-004 | -9.57E-004 | -9.16E-004 | -4.537494800 | FALSE | FALSE | FALSE |                                                                                                                    |
| 'A3_46_1_46_4_46_14RXN'          | 0.00E+000  | 0.00E+000  | 0.00E+000  | #DIV/0!      | FALSE | FALSE | FALSE |                                                                                                                    |
| 'RXN01134'                       | 1.08E+001  | 1.08E+001  | 1.08E+001  | 0.000383164  | FALSE | FALSE | FALSE |                                                                                                                    |
| 'RXN01137'                       | 1.08E+001  | 1.08E+001  | 1.08E+001  | 0.000383164  | FALSE | FALSE | FALSE | 'Pyruvatedehydrogenasehidroliopate_c + NAD_c <=> Pyruvatedehydrogenaseiploate_c + PROTON_c + NADH_c'               |
| 'GDPREDUCTRXN'                   | 0.00E+000  | 0.00E+000  | 4.03E-004  | #DIV/0!      | TRUE  | TRUE  | FALSE | 'RedThioredoxin_c + GDP_c -> WATER_c + dGDP_c + OxThioredoxin_c'                                                   |
| 'HOLAOCPSYNTHRXN'                | 0.00E+000  | 0.00E+000  | 0.00E+000  | #DIV/0!      | FALSE | FALSE | FALSE | 'COA_c + apoACP_c -> ACP_c + A3SADP_c'                                                                             |
| 'RXN01133'                       | -1.08E+001 | -1.08E+001 | -1.08E+001 | -0.000383164 | FALSE | FALSE | FALSE | 'Pyruvatedehydrogenasehidroliopate_c + ACETYLYCOA_c <=> COA_c + PyruvatedehydrogenaseactyDHPilopyl_c'              |
| 'CDPREDUCTRXN'                   | 0.00E+000  | 0.00E+000  | 3.32E-005  | #DIV/0!      | FALSE | FALSE | FALSE | 'RedThioredoxin_c + CDP_c -> WATER_c + dCDP_c + OxThioredoxin_c'                                                   |
| 'UDPREDUCTRXN'                   | 0.00E+000  | 0.00E+000  | 0.00E+000  | #DIV/0!      | FALSE | FALSE | FALSE | 'UDP_c + RedThioredoxin_c -> WATER_c + dUDP_c + OxThioredoxin_c'                                                   |
| 'ADPREDUCTRXN'                   | 9.16E-004  | 9.80E-004  | 9.57E-004  | 52.16524743  | TRUE  | FALSE | FALSE | 'ADP_c + RedThioredoxin_c -> WATER_c + dADP_c + OxThioredoxin_c'                                                   |
| 'RXN18KM3'                       | 0.00E+000  | 0.00E+000  | 0.00E+000  | #DIV/0!      | FALSE | FALSE | FALSE | 'PHOSPHOENOLPYRUVATE_c + SER_c <=> PYRUVATE_c + A3SPERINE_c'                                                       |
| 'TRANSRXN18KM6'                  | 0.00E+000  | 0.00E+000  | 0.00E+000  | #DIV/0!      | FALSE | FALSE | FALSE | 'CPD4422_c -> CPD4422_c'                                                                                           |
| 'carbonate_coz'                  | 0.00E+000  | 0.00E+000  | 0.00E+000  | #DIV/0!      | FALSE | FALSE | FALSE | 'WATER_c + H2O_c <=> H2CO3_c'                                                                                      |
| 'transport_alanine'              | 8.01E-003  | 8.01E-003  | 8.01E-003  | 0.005517349  | FALSE | FALSE | FALSE | 'WATER_c + ATP_c + LALPHAALANINE_c -> ADP_c + PROTON_c + Pi_c + LALPHAALANINE_c'                                   |
| 'transport_arginine'             | 3.84E-003  | 3.84E-003  | 3.84E-003  | 0.005517349  | FALSE | FALSE | FALSE | 'WATER_c + ATP_c + ARG_c -> ADP_c + PROTON_c + Pi_c + ARG_c'                                                       |
| 'transport_L-asparagine'         | 5.77E-003  | 5.77E-003  | 5.77E-003  | 0.005517349  | FALSE | FALSE | FALSE | 'WATER_c + ATP_c + ASN_c -> ADP_c + PROTON_c + Pi_c + ASN_c'                                                       |
| 'transport_L-aspartate'          | 5.41E-003  | 5.41E-003  | 5.41E-003  | 0.005517349  | FALSE | FALSE | FALSE | 'WATER_c + ATP_c + LAsPARTATE_c -> ADP_c + PROTON_c + LAsPARTATE_c + Pi_c'                                         |
| 'transport_L-cysteine'           | 8.65E-004  | 8.65E-004  | 8.65E-004  | 0.005517349  | FALSE | FALSE | FALSE | 'WATER_c + ATP_c + CYS_c -> ADP_c + PROTON_c + Pi_c + CYS_c'                                                       |
| 'transport_L-glutamate'          | 6.17E-003  | 6.14E-003  | 6.17E-003  | 0.54424672   | FALSE | FALSE | FALSE | 'WATER_c + ATP_c + GLT_c -> ADP_c + PROTON_c + Pi_c + LYS_c'                                                       |
| 'transport_L-glutamine'          | 5.53E-003  | 5.56E-003  | 5.56E-003  | 0.005517349  | FALSE | FALSE | FALSE | 'WATER_c + ATP_c + GLN_c -> ADP_c + PROTON_c + Pi_c + PHE_c'                                                       |
| 'transport_L-glycine'            | 6.26E-003  | 6.26E-003  | 6.26E-003  | 0.005517349  | FALSE | FALSE | FALSE | 'WATER_c + ATP_c + GLY_c -> ADP_c + PROTON_c + Pi_c + LEU_c'                                                       |
| 'transport_L-histidine'          | 1.79E-003  | 1.79E-003  | 1.79E-003  | 0.005517349  | FALSE | FALSE | FALSE | 'WATER_c + ATP_c + HIS_c -> ADP_c + PROTON_c + Pi_c + ILE_c'                                                       |
| 'transport_L-isoleucine'         | 6.39E-003  | 6.39E-003  | 6.39E-003  | 0.005517349  | FALSE | FALSE | FALSE | 'WATER_c + ATP_c + LEU_c -> ADP_c + PROTON_c + Pi_c + LEU_c'                                                       |
| 'transport_L-leucine'            | 8.87E-003  | 8.87E-003  | 8.87E-003  | 0.005517349  | FALSE | FALSE | FALSE | 'WATER_c + ATP_c + LYS_c -> ADP_c + PROTON_c + Pi_c + LYS_c'                                                       |
| 'transport_L-lysine'             | 9.28E-003  | 9.27E-003  | 9.28E-003  | 0.005517349  | FALSE | FALSE | FALSE | 'WATER_c + ATP_c + MET_c -> ADP_c + PROTON_c + Pi_c + MET_c'                                                       |
| 'transport_L-methionine'         | 1.45E-003  | 1.45E-003  | 1.45E-003  | 0.005517349  | FALSE | FALSE | FALSE | 'WATER_c + ATP_c + PHE_c -> ADP_c + PROTON_c + Pi_c + PHE_c'                                                       |
| 'transport_L-phenylalanine'      | 4.45E-003  | 4.45E-003  | 4.45E-003  | 0.005517349  | FALSE | FALSE | FALSE | 'WATER_c + ATP_c + PRO_c -> ADP_c + PROTON_c + Pi_c + PRO_c'                                                       |
| 'transport_L-proline'            | 4.19E-003  | 4.19E-003  | 4.19E-003  | 0.005517349  | FALSE | FALSE | FALSE | 'WATER_c + ATP_c + SER_c -> ADP_c + PROTON_c + Pi_c + SER_c'                                                       |
| 'transport_L-serine'             | 6.13E-003  | 6.13E-003  | 6.13E-003  | 0.005517349  | FALSE | FALSE | FALSE | 'WATER_c + ATP_c + THR_c -> ADP_c + PROTON_c + Pi_c + THR_c'                                                       |
| 'transport_L-threonine'          | 6.11E-003  | 6.11E-003  | 6.11E-003  | 0.005517349  | FALSE | FALSE | FALSE | 'WATER_c + ATP_c + TRP_c -> ADP_c + PROTON_c + Pi_c + TRP_c'                                                       |
| 'transport_L-tryptophan'         | 9.07E-004  | 9.07E-004  | 9.07E-004  | 0.005517349  | FALSE | FALSE | FALSE | 'WATER_c + ATP_c + VAL_c -> ADP_c + PROTON_c + Pi_c + VAL_c'                                                       |
| 'transport_L-tyrosine'           | 2.91E-003  | 2.91E-003  | 2.91E-003  | 0.005517349  | FALSE | FALSE | FALSE | 'PROTON_c + GUANINE_c <=> PROTON_c + GUANINE_c'                                                                    |
| 'transport_L-uracil'             | 7.27E-003  | 7.27E-003  | 7.27E-003  | 0.005517349  | FALSE | FALSE | FALSE | 'PROTON_c + URACIL_c <=> URACIL_c + PROTON_c'                                                                      |
| 'transport_guanine'              | 1.37E-003  | 1.37E-003  | 1.37E-003  | 0.005517349  | FALSE | FALSE | FALSE | 'PROTON_c + ADENINE_c <=> PROTON_c + ADENINE_c'                                                                    |
| 'transport_uracil'               | 0.00E+000  | 0.00E+000  | 7.79E-006  | #DIV/0!      | FALSE | FALSE | FALSE | 'PROTON_c + THYMINE_c <=> THYMINE_c + PROTON_c'                                                                    |
| 'transport_adenine'              | 1.99E-003  | 1.99E-003  | 1.99E-003  | 0.005517366  | FALSE | FALSE | FALSE | 'PROTON_c + CYTIDINE_c <=> PROTON_c + CYTIDINE_c'                                                                  |
| 'transport_thymine'              | 9.96E-004  | 9.96E-004  | 9.96E-004  | 0.005517349  | FALSE | FALSE | FALSE | 'PROTON_c + DEOXYCYTIDINE_c <=> DEOXYCYTIDINE_c + PROTON_c'                                                        |
| 'transport_cytidine'             | 0.00E+000  | 0.00E+000  | 4.19E-003  | #DIV/0!      | FALSE | FALSE | FALSE | 'WATER_c + ATP_c + Pi_c -> ADP_c + PROTON_c + 2 Pi_c'                                                              |
| 'transport_deoxytydine'          | 1.84E-003  | 1.84E-003  | 1.84E-003  | 2.212931214  | FALSE | FALSE | FALSE | 'ACET_c + PROTON_c -> PROTON_c + ACET_c'                                                                           |
| 'transport_phosphate_in'         | 0.00E+000  | 0.00E+000  | 4.16E-005  | #DIV/0!      | FALSE | FALSE | FALSE | 'PYRUVATE_c -> PYRUVATE_c'                                                                                         |
| 'transport_acetate'              | 1.08E+001  | 1.08E+001  | 1.08E+001  | 0.000383164  | FALSE | FALSE | FALSE | 'CARBONDIOXIDE_c <=> CARBONDIOXIDE_c'                                                                              |
| 'transport_pyruvate'             | 0.00E+000  | 0.00E+000  | 0.00E+000  | #DIV/0!      | FALSE | FALSE | FALSE | 'WATER_c <=> WATER_c'                                                                                              |
| 'transport_CARBONDIOXIDE'        | 1.08E+001  | 1.08E+001  | 1.08E+001  | 0.000383164  | FALSE | FALSE | FALSE | 'OXYGENMOLECULE_c <=> OXYGENMOLECULE_c'                                                                            |
| 'transport_WATER'                | 1.11E+001  | 1.11E+001  | 1.11E+001  | 0.000481976  | FALSE | FALSE | FALSE | 'AMMONIA_c <=> AMMONIA_c'                                                                                          |
| 'transport_OXYGENMOLECULE'       | -1.15E+001 | -1.15E+001 | -1.15E+001 | 0.00036203   | FALSE | FALSE | FALSE | 'RIBOFLAVIN_c -> RIBOFLAVIN_c'                                                                                     |
| 'transport_AMMONIA'              | 1.48E-003  | 1.47E-003  | 1.51E-003  | 2.773498369  | FALSE | FALSE | FALSE | 'HYDROGENPEROXIDE_c -> HYDROGENPEROXIDE_c'                                                                         |
| 'transport_Riboflavin'           | 0.00E+000  | 0.00E+000  | 0.00E+000  | #DIV/0!      | FALSE | FALSE | FALSE | 'LongChainFattyAcids_c <=> LongChainFattyAcids_c'                                                                  |
| 'transport_H2O2'                 | 6.34E-001  | 6.34E-001  | 6.34E-001  | 0.003279506  | FALSE | FALSE | FALSE | 'PANTHEINEINP_c <=> PANTHEINEINP_c'                                                                                |
| 'transport_FA'                   | -5.53E-003 | -5.53E-003 | -5.53E-003 | -0.005517349 | FALSE | FALSE | FALSE | 'PHOSPHATIDYL_CHOLINE_c <=> PHOSPHATIDYL_CHOLINE_c'                                                                |
| 'transport_pantheine'            | 0.00E+000  | 0.00E+000  | 0.00E+000  | #DIV/0!      | FALSE | FALSE | FALSE | 'MYOINOSITOL_c <=> MYOINOSITOL_c'                                                                                  |
| 'transport_PHOSPHATIDYL_CHOLINE' | -1.68E+003 | -1.68E+003 | -1.68E+003 | 0.005517349  | FALSE | FALSE | FALSE | 'Pi_c -> Pi_c'                                                                                                     |
| 'transport_MYO_INOSITOL'         | 0.00E+000  | 0.00E+000  | 0.00E+000  | #DIV/0!      | FALSE | FALSE | FALSE | 'NIACINE_c -> NIACINE_c'                                                                                           |
| 'transport_phosphate_out'        | 1.19E-001  | 1.19E-001  | 1.19E-001  | 0.052521379  | FALSE | FALSE | FALSE | 'PROTON_c <=> PROTON_c'                                                                                            |
| 'transport_niacine'              | 0.00E+000  | 0.00E+000  | 0.00E+000  | #DIV/0!      | FALSE | FALSE | FALSE | 'RIBOSE_c <=> RIBOSE_c'                                                                                            |
| 'EX_PROTON_e'                    | 1.04E+001  | 1.04E+001  | 1.04E+001  | 0.000519786  | FALSE | FALSE | FALSE | 'LACTATE_c <=> LACTATE_c'                                                                                          |
| 'EX_RIBOSE_e'                    | 0.00E+000  | 0.00E+000  | 0.00E+000  | #DIV/0!      | FALSE | FALSE | FALSE | 'FRU_c <=> FRU_c'                                                                                                  |
| 'EX_LACTATE_e'                   | 0.00E+000  | 0.00E+000  | 4.16E-005  | #DIV/0!      | FALSE | FALSE | FALSE | 'ASCORBATE_c <=> ASCORBATE_c'                                                                                      |
| 'EX_FRU_e'                       | 0.00E+000  | 0.00E+000  | 0.00E+000  | #DIV/0!      | FALSE | FALSE | FALSE | 'MANNOSE_c <=> MANNOSE_c'                                                                                          |
| 'EX_ASCORBATE_e'                 | 0.00E+000  | 0.00E+000  | 0.00E+000  | #DIV/0!      | FALSE | FALSE | FALSE | 'CPD4422_c <=> CPD4422_c'                                                                                          |
| 'EX_MANNOSE_e'                   | 0.00E+000  | 0.00E+000  | 0.00E+000  | #DIV/0!      | FALSE | FALSE | FALSE | 'GLYCEROL_c <=> GLYCEROL_c'                                                                                        |
| 'EX_CPD4422_e'                   | -5.10E-001 | -5.10E-001 | -5.10E-001 | -0.004074449 | FALSE | FALSE | FALSE | 'SER_c <=> SER_c'                                                                                                  |

Table S5

|                                 |            |            |            |              |       |       |       |                                                                                                                                                                                                                                                                                                                                                                                                                                                                                                                                                                                                                                                                                                                                                                                                                                                                                   |
|---------------------------------|------------|------------|------------|--------------|-------|-------|-------|-----------------------------------------------------------------------------------------------------------------------------------------------------------------------------------------------------------------------------------------------------------------------------------------------------------------------------------------------------------------------------------------------------------------------------------------------------------------------------------------------------------------------------------------------------------------------------------------------------------------------------------------------------------------------------------------------------------------------------------------------------------------------------------------------------------------------------------------------------------------------------------|
| 'EX_LongChainFattyAcids_e'      | -5.53E-003 | -5.53E-003 | -5.53E-003 | -0.005517349 | FALSE | FALSE | FALSE | LongChainFattyAcids_e <=>                                                                                                                                                                                                                                                                                                                                                                                                                                                                                                                                                                                                                                                                                                                                                                                                                                                         |
| 'EX_PANTHETHEINP_e'             | 0.00E+000  | 0.00E+000  | 0.00E+000  | #DIV/0!      | FALSE | FALSE | FALSE | 'PANTHETHEINP_e <=>'                                                                                                                                                                                                                                                                                                                                                                                                                                                                                                                                                                                                                                                                                                                                                                                                                                                              |
| 'EX_PHOSPHATIDYL_CHOLINE_e'     | -1.66E-003 | -1.66E-003 | -1.66E-003 | -0.005517349 | FALSE | FALSE | FALSE | 'PHOSPHATIDYL_CHOLINE_e <=>'                                                                                                                                                                                                                                                                                                                                                                                                                                                                                                                                                                                                                                                                                                                                                                                                                                                      |
| 'EX_MYOINOSITOL_e'              | 0.00E+000  | 0.00E+000  | 0.00E+000  | #DIV/0!      | FALSE | FALSE | FALSE | 'MYOINOSITOL_e <=>'                                                                                                                                                                                                                                                                                                                                                                                                                                                                                                                                                                                                                                                                                                                                                                                                                                                               |
| 'EX_NIACINE_e'                  | 0.00E+000  | 0.00E+000  | 0.00E+000  | #DIV/0!      | FALSE | FALSE | FALSE | 'NIACINE_e <=>'                                                                                                                                                                                                                                                                                                                                                                                                                                                                                                                                                                                                                                                                                                                                                                                                                                                                   |
| 'Protein_synthesis'             | 6.37E-004  | 6.37E-004  | 6.37E-004  | 0.00327938   | FALSE | FALSE | FALSE | '482 WATER_c + 22 ChargedGLTIRNAs_c + 21 ChargedTHRIRNAs_c + 21 ChargedGLYIRNAs_c + 32 ChargedLYSIRNAs_c + 21 ChargedSERIRNAs_c + 6 ChargedHISIRNAs_c + 826 ATP_c + 13 ChargedARGIRNAs_c + 17 ChargedGLNIRNAs_c + 3 ChargedTRPIRNAs_c + 29 ChargedLEUIRNAs_c + 25 ChargedVALIRNAs_c + 14 ChargedPROIRNAs_c + 15 ChargedPHEIRNAs_c + 22 ChargedILEIRNAs_c + 10 ChargedTYRIRNAs_c + 27 ChargedALAIRNAs_c + 18 ChargedASPIRNAS_c + 22 ChargedASNIRNAs_c + 5 ChargedMETIRNAs_c + 3 ChargedCYSIRNAs_c -> 21 THRIRNAs_c + 17 GLNIRNAs_c + 22 ILEIRNAs_c + 29 LEUIRNAS_c + 826 ADP_c + 21 GLYIRNAS_c + 5 METIRNAS_c + 25 VALIRNAS_c + 13 ARGIRNAS_c + 826 PROTON_c + 20 ASNIRNAS_c + 21 SERIRNAS_c + 10 TYRIRNAS_c + 826 PI_c + 32 LYSIRNAS_c + 18 ASPIRNAS_c + 14 PROIRNAS_c + 27 ALAIRNAS_c + 3 TRPIRNAS_c + 22 GLTIRNAS_c + 3 CYSIRNAS_c + 6 HISIRNAS_c + 15 PHEIRNAS_c + PROT_mol_c' |
| 'Protein_synthesis_gram'        | 1.09E-002  | 1.09E-002  | 1.09E-002  | 0.005517349  | FALSE | FALSE | FALSE | '0.0263 PROT_mol_c <=> PROT_g_c'                                                                                                                                                                                                                                                                                                                                                                                                                                                                                                                                                                                                                                                                                                                                                                                                                                                  |
| 'ACP_synthesis'                 | 1.87E-006  | 1.87E-006  | 1.96E-006  | 4.784434157  | FALSE | FALSE | FALSE | '199 WATER_c + 11 ChargedGLTIRNAs_c + ChargedTHRIRNAs_c + ChargedGLYIRNAs_c + 11 ChargedLYSIRNAs_c + 5 ChargedSERIRNAs_c + ChargedHISIRNAs_c + 199 ATP_c + 2 ChargedARGIRNAs_c + 4 ChargedGLNIRNAs_c + 12 ChargedLEUIRNAS_c + 5 ChargedVALIRNAS_c + ChargedPROIRNAS_c + 5 ChargedPHEIRNAS_c + 8 ChargedILEIRNAS_c + 4 ChargedALAIRNAS_c + 6 ChargedASPIRNAS_c + 3 ChargedASNIRNAS_c + 4 ChargedMETIRNAS_c -> THRIRNAS_c + 4 GLNIRNAS_c + 8 ILEIRNAS_c + 12 LEUIRNAS_c + 199 ADP_c + GLYIRNAS_c + 4 METIRNAS_c + 5 VALIRNAS_c + 2 ARGIRNAS_c + 199 PROTON_c + 3 ASNIRNAS_c + 5 SERIRNAS_c + 199 PI_c + 11 LYSIRNAS_c + 6 ASPIRNAS_c + PROIRNAS_c + 4 ALAIRNAS_c + 11 GLTIRNAS_c + HISIRNAS_c + ACP_c + 5 PHEIRNAS_c'                                                                                                                                                               |
| 'ACP_synthesis_gram'            | 1.77E-005  | 1.77E-005  | 1.77E-005  | 0.005517666  | FALSE | FALSE | FALSE | '0.10579 ACP_c <=> ACP_g_c'                                                                                                                                                                                                                                                                                                                                                                                                                                                                                                                                                                                                                                                                                                                                                                                                                                                       |
| 'Protein_degradation'           | 3.49E-004  | 3.49E-004  | 3.49E-004  | 0.005985701  | FALSE | FALSE | FALSE | '1032 WATER_c + 688 ATP_c + PROT_mol_c -> 25 VAL_c + 17 GLN_c + 21 GLY_c + 22 GLT_c + 6 HIS_c + 688 ADP_c + 14 PRO_c + 10 TYR_c + 688 PROTON_c + 18 LASPARTATE_c + 21 SER_c + 20 ASN_c + 3 CYS_c + 5 MET_c + 21 THR_c + 15 PHE_c + 688 PI_c + 27 LALPHAALANINE_c + 13 ARG_c + 22 ILE_c + 32 LYS_c + 3 TRP_c + 29 LEU_c'                                                                                                                                                                                                                                                                                                                                                                                                                                                                                                                                                           |
| 'ACP_degradation'               | 0.00E+000  | 0.00E+000  | 8.94E-008  | #DIV/0!      | FALSE | FALSE | FALSE | '219 WATER_c + 146 ATP_c + ACP_c -> 5 VAL_c + 4 GLN_c + 4 GLY_c + 11 GLT_c + HIS_c + 146 ADP_c + PRO_c + 146 PROTON_c + 6 LASPARTATE_c + 5 SER_c + 3 ASN_c + 4 MET_c + THR_c + 5 PHE_c + 146 PI_c + 4 LALPHAALANINE_c + 2 ARG_c + 8 ILE_c + 11 LYS_c + 12 LEU_c'                                                                                                                                                                                                                                                                                                                                                                                                                                                                                                                                                                                                                  |
| 'DNA_synthesis'                 | 1.40E-005  | 1.40E-005  | 1.40E-005  | 0.005517349  | FALSE | FALSE | FALSE | '71.2 TTP_c + 71.2 DATP_c + 28.8 DGTTP_c + 28.8 DCTP_c -> 200 PPI_c + DNA_mmol_c                                                                                                                                                                                                                                                                                                                                                                                                                                                                                                                                                                                                                                                                                                                                                                                                  |
| 'DNA_synthesis_gram'            | 8.83E-004  | 8.83E-004  | 8.83E-004  | 0.005517344  | FALSE | FALSE | FALSE | '0.015849 DNA_mmol_c <=> DNA_g_c                                                                                                                                                                                                                                                                                                                                                                                                                                                                                                                                                                                                                                                                                                                                                                                                                                                  |
| 'RNA_synthesis'                 | 7.78E-003  | 7.78E-003  | 7.78E-003  | 0.002227073  | FALSE | FALSE | FALSE | '18 CTP_c + 29 ATP_c + 28 GTP_c + 25 UTP_c -> 100 PPI_c + RNA_mmol_c                                                                                                                                                                                                                                                                                                                                                                                                                                                                                                                                                                                                                                                                                                                                                                                                              |
| 'RNA_synthesis_gram'            | 1.15E-003  | 1.15E-003  | 1.15E-003  | 0.005517349  | FALSE | FALSE | FALSE | '0.029982 RNA_mmol_c <=> RNA_g_c                                                                                                                                                                                                                                                                                                                                                                                                                                                                                                                                                                                                                                                                                                                                                                                                                                                  |
| 'RNA_degradation'               | 7.74E-003  | 7.74E-003  | 7.74E-003  | 0.002238973  | FALSE | FALSE | FALSE | '100 WATER_c + RNA_mmol_c -> 18 CMP_c + 100 PROTON_c + 29 AMP_c + 28 GMP_c                                                                                                                                                                                                                                                                                                                                                                                                                                                                                                                                                                                                                                                                                                                                                                                                        |
| 'LPHOSPHATIDATE_synthesis_gram' | 1.06E-004  | 1.06E-004  | 1.06E-004  | 0.005517349  | FALSE | FALSE | FALSE | '1.389 LPHOSPHATIDATE_c <=> LPHOSPHATIDATE_g_c'                                                                                                                                                                                                                                                                                                                                                                                                                                                                                                                                                                                                                                                                                                                                                                                                                                   |
| 'CARDIOLIPIN_synthesis_gram'    | 1.77E-003  | 1.77E-003  | 1.77E-003  | 0.005517351  | FALSE | FALSE | FALSE | '0.74195 CARDIOLIPIN_c <=> CARDIOLIPIN_g_c                                                                                                                                                                                                                                                                                                                                                                                                                                                                                                                                                                                                                                                                                                                                                                                                                                        |
| 'PHOSPHATIDYL_CHOLINE_gram'     | 0.00E+000  | 0.00E+000  | 0.00E+000  | #DIV/0!      | FALSE | FALSE | FALSE | '1.3661 PHOSPHATIDYL_CHOLINE_c <=> PHOSPHATIDYL_CHOLINE_g_c'                                                                                                                                                                                                                                                                                                                                                                                                                                                                                                                                                                                                                                                                                                                                                                                                                      |
| 'LIPID_synthesis'               | 3.53E-003  | 3.53E-003  | 3.53E-003  | 0.005517349  | FALSE | FALSE | FALSE | '0.47 PHOSPHATIDYL_CHOLINE_c + 0.03 LPHOSPHATIDATE_g_c + 0.5 CARDIOLIPIN_g_c -> LIPIDS_c                                                                                                                                                                                                                                                                                                                                                                                                                                                                                                                                                                                                                                                                                                                                                                                          |
| 'G6P_gram'                      | 0.00E+000  | 0.00E+000  | 0.00E+000  | #DIV/0!      | FALSE | FALSE | FALSE | '1.3661 Dglucose6phosphate_c <=> Dglucose6phosphate_g_c                                                                                                                                                                                                                                                                                                                                                                                                                                                                                                                                                                                                                                                                                                                                                                                                                           |
| 'AAbiomass_mol'                 | 2.34E-008  | 2.34E-008  | 2.34E-008  | 0.005517349  | FALSE | FALSE | FALSE | '2793 VAL_c + 294 GLN_c + 9220 GLY_c + 1851 GLT_c + 2422 HIS_c + 6837 PRO_c + 1366 TYR_c + 9316 LASPARTATE_c + 3202 SER_c + 54 ASN_c + 67 CYS_c + 100 MET_c + 2489 THR_c + 5122 PHE_c + 9824 LALPHAALANINE_c + 3913 ARG_c + 1858 ILE_c + 1741 LYS_c + 1864 TRP_c + 21313 LEU_c -> AAbiomass_mol_c'                                                                                                                                                                                                                                                                                                                                                                                                                                                                                                                                                                                |
| 'AAbiomass_gram'                | 2.65E-004  | 2.65E-004  | 2.65E-004  | 0.005517366  | FALSE | FALSE | FALSE | '8.8228e-05 AAbiomass_mol_c <=> AAbiomass_g_c                                                                                                                                                                                                                                                                                                                                                                                                                                                                                                                                                                                                                                                                                                                                                                                                                                     |
| 'Biomass_synthesis'             | 1.77E-002  | 1.77E-002  | 1.77E-002  | 0.005517349  | FALSE | FALSE | FALSE | '11.53 WATER_c + 11.53 ATP_c + 0.62 PROT_g_c + 0.001 ACP_g_c + 0.05 DNA_g_c + 0.065 RNA_g_c + 0.2 EX_BIOMASS_g_c -> 11.53 ADP_c + 0.015 AAbiomass_g_c -> 11.53 PROTON_c + 11.53 PI_c + BIOMASS_g_c'                                                                                                                                                                                                                                                                                                                                                                                                                                                                                                                                                                                                                                                                               |
| 'EX_BIOMASS_g_c'                | 1.77E-002  | 1.77E-002  | 1.77E-002  | 0.005517349  | FALSE | FALSE | FALSE | 'BIOMASS_g_c <=>'                                                                                                                                                                                                                                                                                                                                                                                                                                                                                                                                                                                                                                                                                                                                                                                                                                                                 |
| 'DEOXYGUANOSINEKINASERXN'       | 4.03E-004  | 0.00E+000  | 4.45E-004  | 110.3069201  | TRUE  | FALSE | FALSE | 'ATP_c + DEOXYGUANOSINE_c <=> ADP_c + PROTON_c + DGMP_c'                                                                                                                                                                                                                                                                                                                                                                                                                                                                                                                                                                                                                                                                                                                                                                                                                          |
| 'DEOXYADENOSINEKINASERXN'       | 8.04E-005  | 3.88E-005  | 5.17E-004  | 594.25238201 | TRUE  | FALSE | FALSE | 'ATP_c + DEOXYADENOSINE_c <=> ADP_c + PROTON_c + DAMP_c'                                                                                                                                                                                                                                                                                                                                                                                                                                                                                                                                                                                                                                                                                                                                                                                                                          |
| 'UMPKINASERXN'                  | 1.95E-001  | 1.95E-001  | 1.95E-001  | 0.017049589  | FALSE | FALSE | FALSE | 'ATP_c + UMP_c <=> UDP_c + ADP_c'                                                                                                                                                                                                                                                                                                                                                                                                                                                                                                                                                                                                                                                                                                                                                                                                                                                 |
| 'ACYLCOASYNTHRXXN'              | 5.53E-003  | 5.53E-003  | 5.53E-003  | 0.005517349  | FALSE | FALSE | FALSE | 'ATP_c + COA_c + LongChainFattyAcids_c <=> PPI_c + AMP_c + LongChainAcyCoAs_c                                                                                                                                                                                                                                                                                                                                                                                                                                                                                                                                                                                                                                                                                                                                                                                                     |
| 'NADKINRXN'                     | -9.16E-004 | -9.57E-004 | -9.16E-004 | -4.537494406 | FALSE | FALSE | FALSE | 'ATP_c + NAD_c <=> ADP_c + PROTON_c + NADP_c'                                                                                                                                                                                                                                                                                                                                                                                                                                                                                                                                                                                                                                                                                                                                                                                                                                     |
| 'NADHKINRXN'                    | 9.16E-004  | 9.57E-004  | 9.57E-004  | 4.537494406  | FALSE | FALSE | FALSE | 'ATP_c + NADH_c <=> ADP_c + PROTON_c + NADPH_c'                                                                                                                                                                                                                                                                                                                                                                                                                                                                                                                                                                                                                                                                                                                                                                                                                                   |

Reactions for which flux can be used  
20

4

3
